# Supplementary material for: The lithium intercalation compound Li2CoSiO4 and its behaviour as a positive electrode for lithium batteries
Source: Royal Society of Chemistry journal article supplement (doi:10.1039/b711552k), 2007-01-01

**Supplementary information to accompany**

**The Lithium Intercalation Compound  $\text{Li}_2\text{CoSiO}_4$  and its Behaviour as a Lithium Battery**

**Cathode**

TEM images of composite cathodes formed after combining Kynar with the ball-milled mixture  $\text{Li}_2\text{CoSiO}_4$  / Super P. a)  $\beta_{\text{II}}$ , b)  $\beta_1$  c)  $\gamma_0$ . The particles are embedded in the polymer film.

a)  $\beta_{\text{II}}$  ballmilled

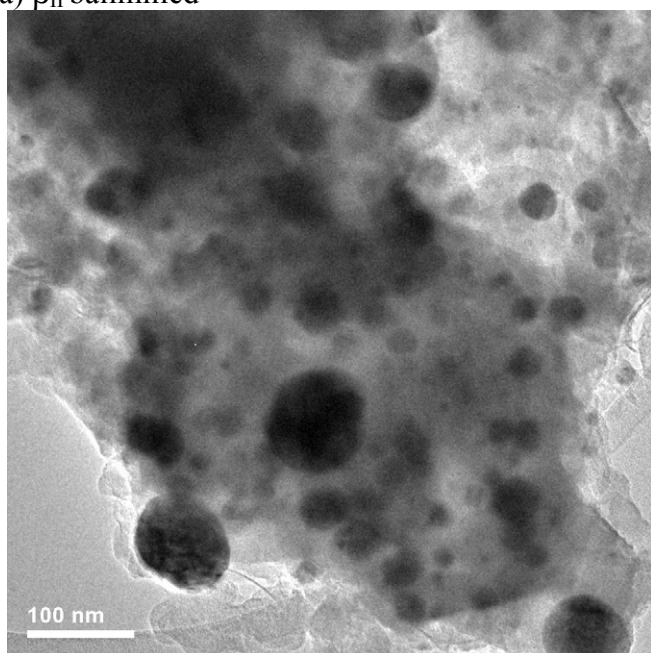

b)  $\beta_1$  ballmilled

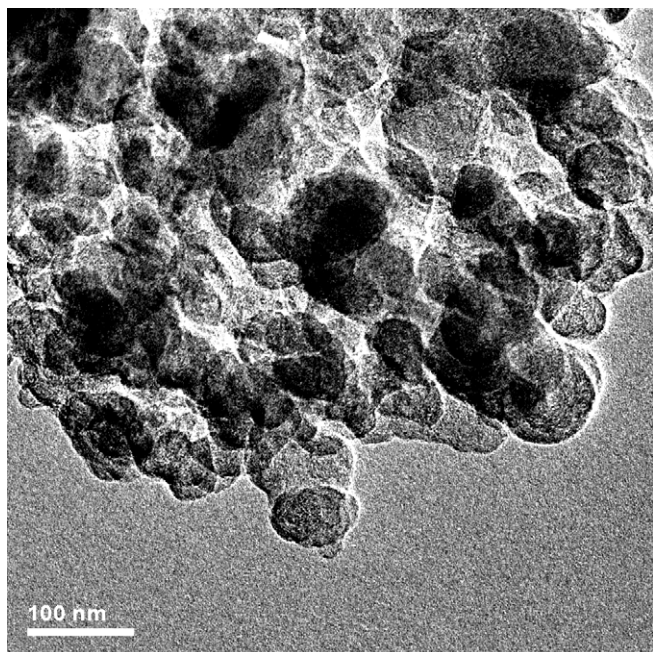

c)  $\gamma_0$  ball milled

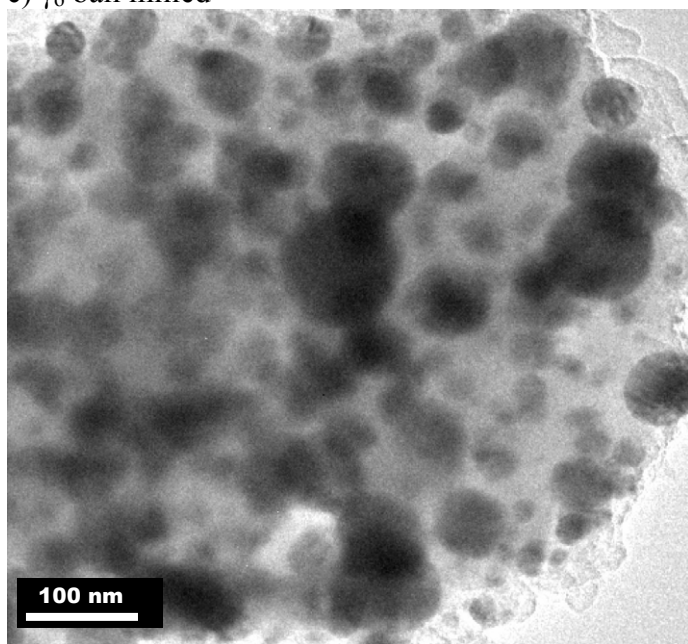

Comparison of powder X-ray diffraction patterns for as-prepared and ball-milled  $\beta_{II}$   $\text{Li}_2\text{CoSiO}_4$

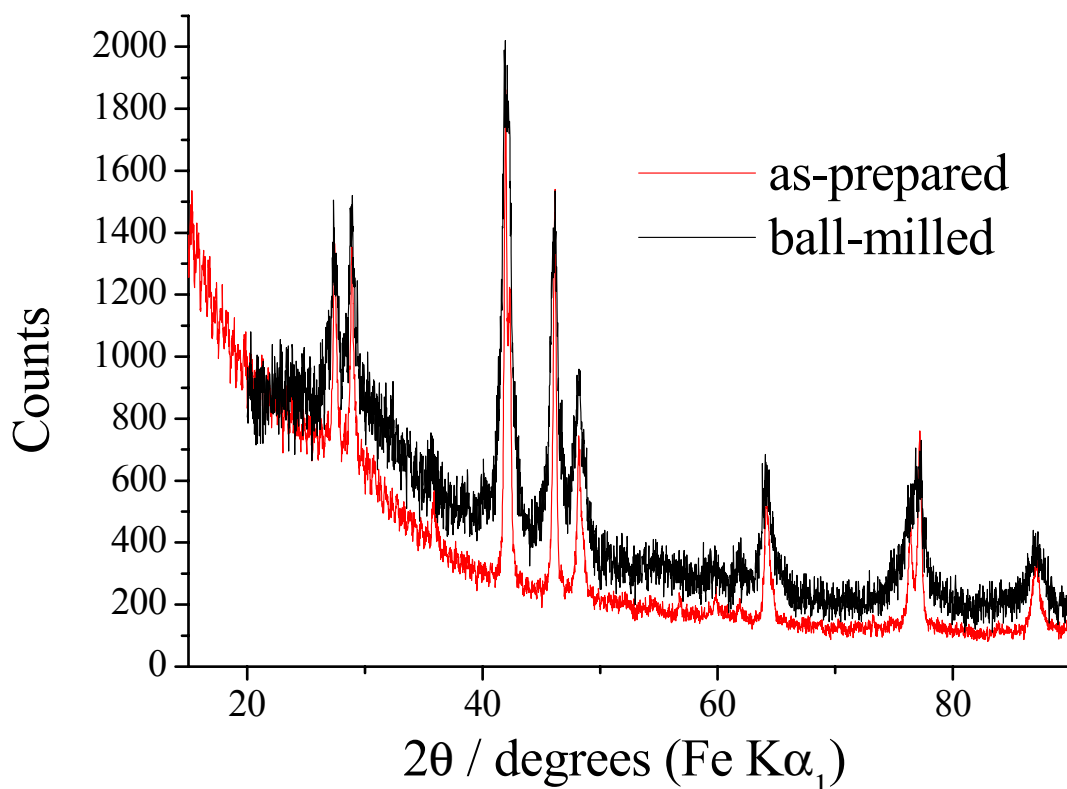

Comparison of powder X-ray diffraction patterns for as-prepared and ball-milled  $\beta_I$   $\text{Li}_2\text{CoSiO}_4$

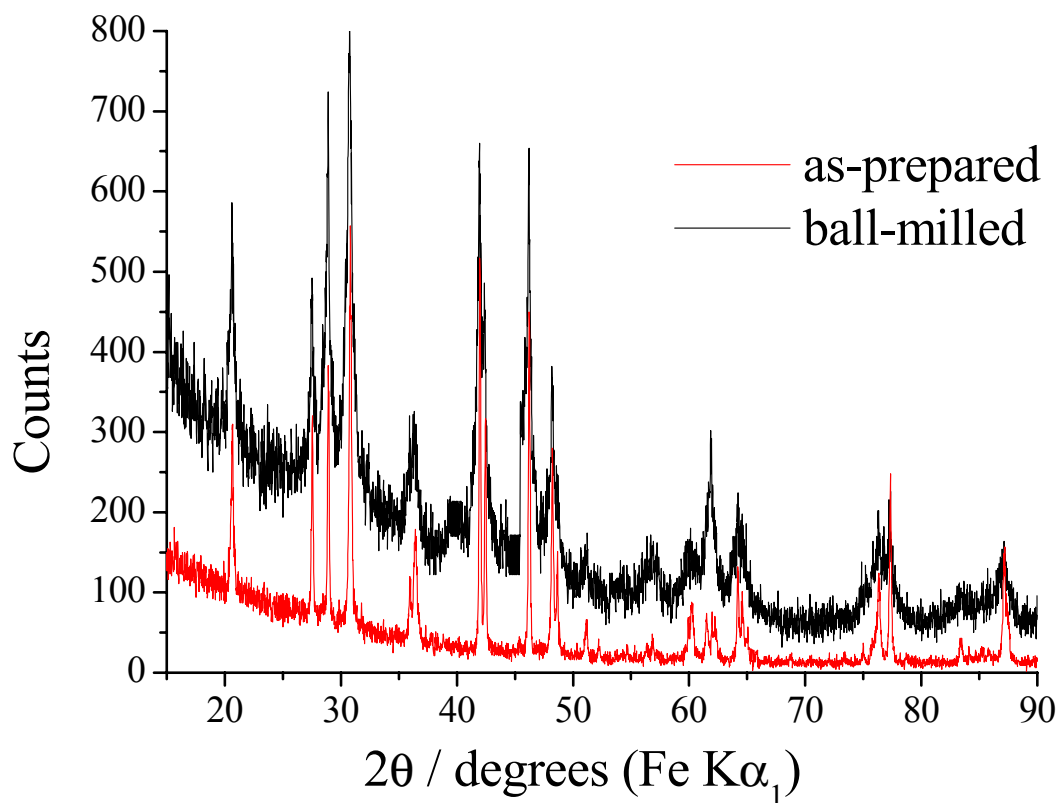

Comparison of powder X-ray diffraction patterns for as-prepared and ball-milled  $\gamma_0$  Li<sub>2</sub>CoSiO<sub>4</sub>

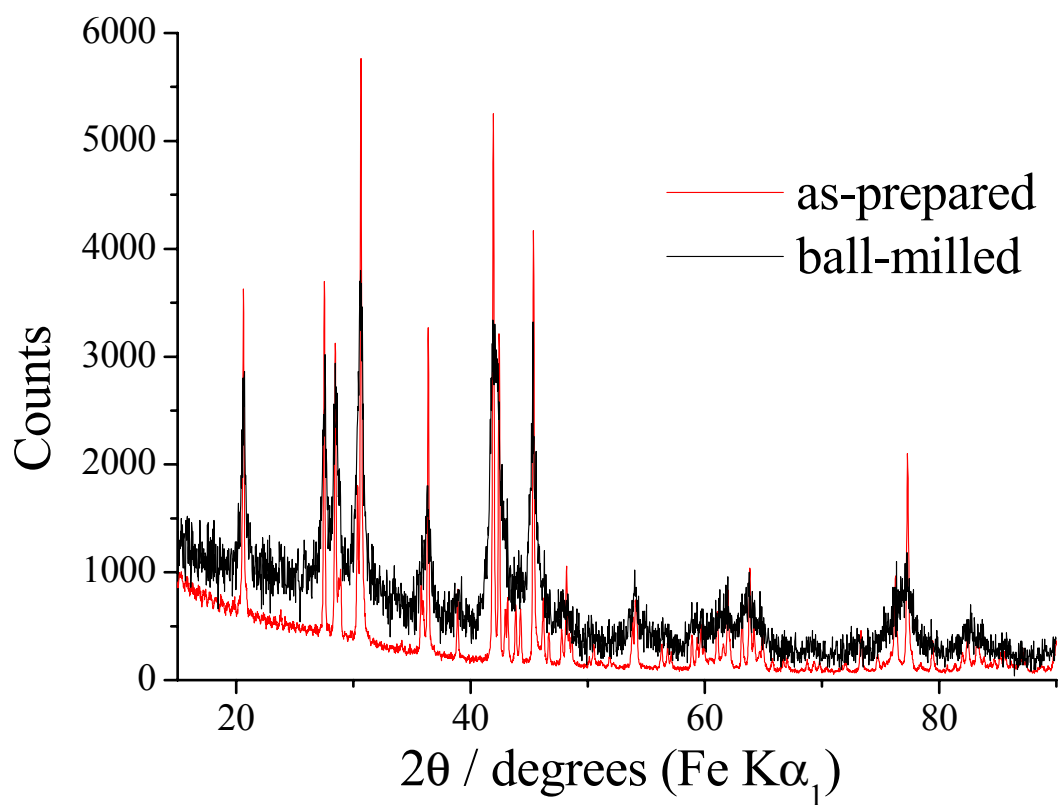

Supplement: b711552k.pdf [file b711552k.pdf]
